# Supplementary material for: Comparative genomics reveals conservation of filaggrin and loss of caspase-14 in dolphins
Source: PubMed Central journal article supplement (PMC4437054; doi:10.1111/exd.12681), 2015-04-27
Supplement: exd0024-0365-sd1.pdf [file exd0024-0365-sd1.pdf]

## **Supplementary Data**

### **Comparative genomics reveals conservation of filaggrin and loss of caspase-14 in dolphins**

Bettina Strasser, Veronika Mlitz, Heinz Fischer, Erwin Tschachler, Leopold Eckhart

#### **Contents**

Supplementary Figures S1 – S11

Supplementary Tables S1 – S2

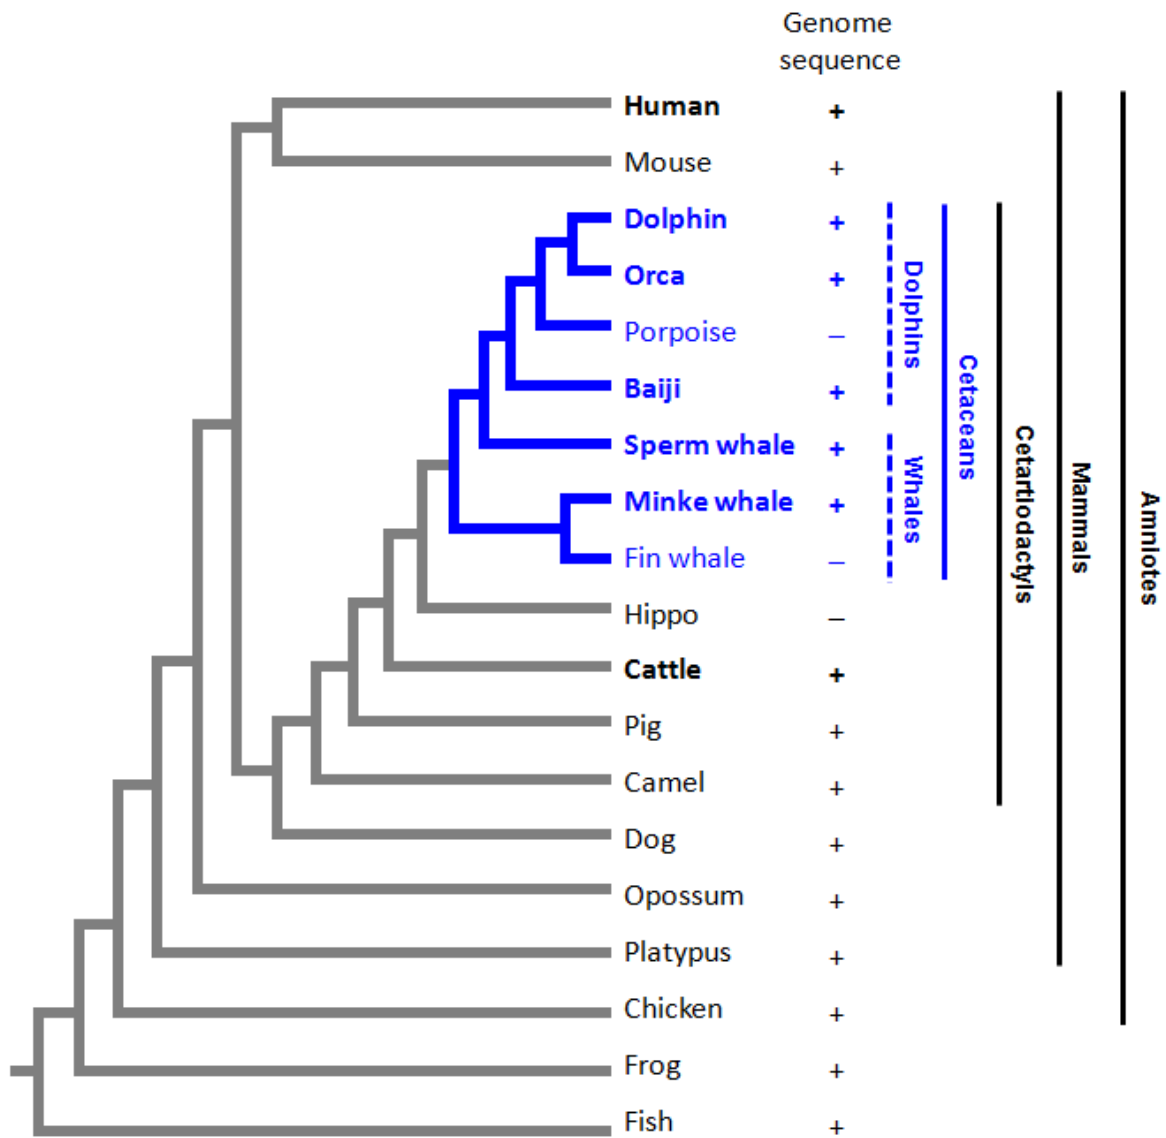

**Suppl. Fig. S1. Phylogenetic tree of cetaceans and other vertebrates.** The phylogenetic tree shows the relationship of the species mentioned in this study. Phylogenetic clades are indicated on the right. The species referred to as "dolphin" is the bottlenose dolphin (*Tursiops truncatus*). The clade referred to as "dolphins" comprises the bottlenose dolphin and orca (oceanic dolphins) and baiji (river dolphin). The order of cetaceans is highlighted by blue color. The availability or absence of genome sequences in the GenBank database is indicated by + and -, respectively. The comparative genomics studies were focused on the species indicated with bold letters.

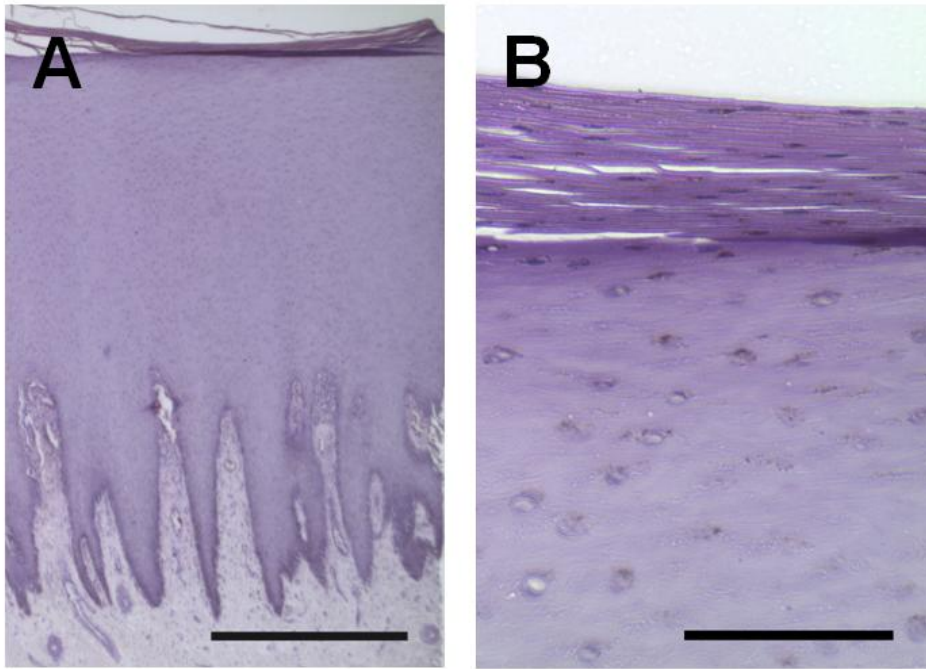

**Suppl. Fig. S2. Histology of the bottlenose dolphin skin.** Skin sections were stained with hematoxylin and eosin. **(A)** Section of the skin. The epidermis is several millimeters thick. Bar, 1000  $\mu\text{m}$ . **(B)** Outermost part of the epidermis. Panels A and B are from different sections. Bar, 100  $\mu\text{m}$ .

|         |  | <u>S100 domain</u>                                                                                                    |                |
|---------|--|-----------------------------------------------------------------------------------------------------------------------|----------------|
| Dolphin |  | MSTLLENI TAI IKLFHEYSKTDKEDTDLAKELKELLEAEFQILKKNPDDPDTADVFMHILLDVDHNNKIDFTEFFLMVFKLAQAYV-YTORPNFKTLGKQKKNRY           | 105            |
| Orca    |  | MSTLLENI TAI IKLFHEYSKTDKEDTDLAKELKELLEAEFQILKKNPDDPDTADVFMHILLDVDHNNKIDFTEFFLMVFKLAQAYV-YTORPNFKTLGKQKKNRY           | 105            |
| Baiji   |  | MSTLLENI TAI IKLFHEYSKTDKEDTDLAKELKELLEAEFQILKKNPDDPDTADVFMHILLDVDHNNKIDFTEFFLMVFKLAQAYV-YTORPNFKTLGKQKKNRY           | 105            |
| Cattle  |  | MSTLLENI INDI IKLFHYSKTDKEDTDLAKELKELVEVEFPFLLKKNPDDPDTAEVFMYLNDRDHNKIDFTEFFLMVFKVAVVYSYTORQNLQRAQKQKCTY              | 106            |
| Dolphin |  | HYE---DDTEEGKEERERKSSHS-RSDGKKEDRTEEEEE-GRSRHGSSSG-REGRHR-----NRSKKRHSREKRRASSTELKERSHMSSVPIREYEGK                    | 198            |
| Orca    |  | HYE---DDTEEGKEERERKSSHS-RSDGKKEDRTEEEEE-GRSRHGSSSG-REGRHR-----NRSKKRHSREKRRASSTELKERSHMSSVPIREYEGK                    | 198            |
| Baiji   |  | HYE---DDTEEGKEERERKSSHSGRSDGKKEDRTEPRGRGRSRHGSSSGREGRGRDRATSGHRNRCGKHHHSREKRRASSTELKERSHMSSVPIREYEGK                  | 208            |
| Cattle  |  | HYGDEEDDTEED-KEETERKYSHS-RSDGKTQDRSKSPRGRGKRRHGSGSGKQRGDPTTSLRHGCSKK-HESRREKRRASSTELKERSHMSSVPIREYEGK                 | 209            |
|         |  | <u>partial repeat</u>                                                                                                 | <u>linker</u>  |
| Dolphin |  | EEERGYENKDRGCEKWI GSEPKGSYQVCEETVTMDFQSGCSTQQVSSISKGSDSKEHSQDSGRQPII THGRSPSSSRNQHGSSSHQSDSDSPKHSESHQGRDTDRHKSSES     | 307            |
| Orca    |  | EEERGYENKDRGCEKWI GSEPKGSYQVCEETVTMDFQSGCSTQQVSSISKGSDSKEHSQDSGRQPII THGRSPSSSRNQHGSSSHQSDSDSPKHSESHQGRDTDRHKSSES     | 307            |
| Baiji   |  | EE-RGYENKDRGCEKWI GSEPKGKLYQVCEETVTMDFQSGCSTHRVSSISKGSDSKEHSQDSGRQPII THGRSPSSSRNQHGSSSHQSDSDSPKHSESHQGRDTDRHKSSES    | 316            |
| Cattle  |  | EEHGYENKDRGKTSAKCIGSEYDSSYQVCEEDVVTNFPQPSHSKNYGSNITKGRDTEGHSRTERKSVFTHARSSSSRNQHGSSSHQSDSDSPKHSESHQGRDTDRHKSSES       | 313            |
|         |  | <u>repeat 1</u>                                                                                                       | <u>linker</u>  |
| Dolphin |  | VHGKSGSSTTQRQGRHHEQERDSSRP SGTGHGHA STGSGSSRHRESSVGS SDSEIQSGN SGRY SVTTHGRS GSSSRNQHGSSSHQSDSDSRHSESHQGRDTDRHKSSES   | 416            |
| Orca    |  | VHGKSGSSTTQRQGRHHEQERDSSRP SGTGHGHA STGSGSSRHRESSVGS SDSEIQSGN SGRY SVTTHGRS GSSSRNQHGSSSHQSDSDSRHSESHQGRDTDRHKSSES   | 416            |
| Baiji   |  | VHGKSGSSTTQRQGRHHEQERDSSRP SGTGHGHA STGSGSSRHRESSVGS SDSEIQSGN SGRY SVTTHGRS GSSSRNQHGSSSHQSDSDSRHSESHQGRDTDRHKSSES   | 425            |
| Cattle  |  | VHRRS-RNTQRQGRSHHEQERDSSRP SGTGHGHA STGSGSSRHRESSVGS SDSEIQSGN SGRY SVTTHGRS GSSSRNQHGSSSHQSDSDSRHSESHQGRDTDRHKSSES   | 416            |
|         |  | <u>repeat 2</u>                                                                                                       | <u>linker</u>  |
| Dolphin |  | CHSRKSGSSTTQRQGRHHEQERDSSRH SGTGHGHTS DGRSRGKDR ESSVGS SDSEGO SEDSRH SVTTHGRS GSSSRNQHGSSSHQSDSDSRHSESHQGRDTDRHKSSES  | 525            |
| Orca    |  | CHSRKSGSSTTQRQGRHHEQERDSSRH SGTGHGHTS DGRSRGKDR ESSVGS SDSEGO SEDSRH SVTTHGRS GSSSRNQHGSSSHQSDSDSRHSESHQGRDTDRHKSSES  | 525            |
| Baiji   |  | VHGRSGSSTTQRQGRHHEQERDSSRH SGTGHGHTS DGRSRGKDR ESSVGS SDSEGO SEDSRH SVTTHGRS GSSSRNQHGSSSHQSDSDSRHSESHQGRDTDRHKSSES   | 533            |
| Cattle  |  | LQRSSTTQRQGRSHHEQERDSSRH SGTGHGHTS DGRSRGKDR ESSVGS SDSEGO SEDSRH SVTTHGRS GSSSRNQHGSSSHQSDSDSRHSESHQGRDTDRHKSSES     | 520            |
|         |  | <u>repeat 3 + partial repeat</u>                                                                                      | <u>linker</u>  |
| Dolphin |  | VHGE SSGSSTTQRQGRHHEQERDSSRH SGTGHGHTS DGRSRGKDR ESSVGS SDSEGO SEDSRH SVTTHGRS GSSSRNQHGSSSHQSDSDSRHSESHQGRDTDRHKSSES | 633            |
| Orca    |  | VHGE SSGSSTTQRQGRHHEQERDSSRH SGTGHGHTS DGRSRGKDR ESSVGS SDSEGO SEDSRH SVTTHGRS GSSSRNQHGSSSHQSDSDSRHSESHQGRDTDRHKSSES | 634            |
| Baiji   |  | VHGE SSGSSTTQRQGRHHEQERDSSRH SGTGHGHTS DGRSRGKDR ESSVGS SDSEGO SEDSRH SVTTHGRS GSSSRNQHGSSSHQSDSDSRHSESHQGRDTDRHKSSES | 634            |
| Cattle  |  | VHGRSGSSTTQRQGRSHHEQERDSSRH SGTGHGHTS DGRSRGKDR ESSVGS SDSEGO SEDSRH SVTTHGRS GSSSRNQHGSSSHQSDSDSRHSESHQGRDTDRHKSSES  | 624            |
| Cattle  |  | VHGRSGSSTTQRQGRSHHEQERDSSRH SGTGHGHTS DGRSRGKDR ESSVGS SDSEGO SEDSRH SVTTHGRS GSSSRNQHGSSSHQSDSDSRHSESHQGRDTDRHKSSES  | 672            |
|         |  | <u>repeat 4</u>                                                                                                       | <u>linker</u>  |
| Dolphin |  | VHGRSGSSTTQRQGRHHEQERDSSRH SGTGHGHTS DGRSRGKDR ESSVGS SDSEGO SEDSRH SVTTHGRS GSSSRNQHGSSSHQSDSDSRHSESHQGRDTDRHKSSES   | 741            |
| Orca    |  | VHGRSGSSTTQRQGRHHEQERDSSRH SGTGHGHTS DGRSRGKDR ESSVGS SDSEGO SEDSRH SVTTHGRS GSSSRNQHGSSSHQSDSDSRHSESHQGRDTDRHKSSES   | 743            |
| Baiji   |  | VHGRSGSSTTQRQGRHHEQERDSSRH SGTGHGHTS DGRSRGKDR ESSVGS SDSEGO SEDSRH SVTTHGRS GSSSRNQHGSSSHQSDSDSRHSESHQGRDTDRHKSSES   | 642            |
| Cattle  |  | VHGRSGSSTTQRQGRSHHEQERDSSRH SGTGHGHTS DGRSRGKDR ESSVGS SDSEGO SEDSRH SVTTHGRS GSSSRNQHGSSSHQSDSDSRHSESHQGRDTDRHKSSES  | 776            |
|         |  | <u>repeat 5 + partial repeat</u>                                                                                      | <u>linker</u>  |
| Dolphin |  | CHSRKSGSSTTQRQGRHHEQERDSSRH SGTGHGHTS DGRSRGKDR ESSVGS SDSEGO SEDSRH SVTTHGRS GSSSRNQHGSSSHQSDSDSRHSESHQGRDTDRHKSSES  | 850            |
| Orca    |  | CHSRKSGSSTTQRQGRHHEQERDSSRH SGTGHGHTS DGRSRGKDR ESSVGS SDSEGO SEDSRH SVTTHGRS GSSSRNQHGSSSHQSDSDSRHSESHQGRDTDRHKSSES  | 852            |
| Baiji   |  | VHGRSGSSTTQRQGRHHEQERDSSRH SGTGHGHTS DGRSRGKDR ESSVGS SDSEGO SEDSRH SVTTHGRS GSSSRNQHGSSSHQSDSDSRHSESHQGRDTDRHKSSES   | 750            |
| Cattle  |  | VHGRSGSSTTQRQGRSHHEQERDSSRH SGTGHGHTS DGRSRGKDR ESSVGS SDSEGO SEDSRH SVTTHGRS GSSSRNQHGSSSHQSDSDSRHSESHQGRDTDRHKSSES  | 880            |
| Cattle  |  | VHGRSGSSTTQRQGRSHHEQERDSSRH SGTGHGHTS DGRSRGKDR ESSVGS SDSEGO SEDSRH SVTTHGRS GSSSRNQHGSSSHQSDSDSRHSESHQGRDTDRHKSSES  | 928            |
|         |  | <u>repeats 6-10 + partial repeat</u>                                                                                  | <u>linker</u>  |
| Cattle  |  | VHGRSGSSTTQRQGRSHHEQERDSSRH SGTGHGHTS DGRSRGKDR ESSVGS SDSEGO SEDSRH SVTTHGRS GSSSRNQHGSSSHQSDSDSRHSESHQGRDTDRHKSSES  | 1032           |
| Cattle  |  | VHGRSGSSTTQRQGRSHHEQERDSSRH SGTGHGHTS DGRSRGKDR ESSVGS SDSEGO SEDSRH SVTTHGRS GSSSRNQHGSSSHQSDSDSRHSESHQGRDTDRHKSSES  | 1136           |
| Cattle  |  | VHGRSGSSTTQRQGRSHHEQERDSSRH SGTGHGHTS DGRSRGKDR ESSVGS SDSEGO SEDSRH SVTTHGRS GSSSRNQHGSSSHQSDSDSRHSESHQGRDTDRHKSSES  | 1184           |
| Cattle  |  | VHGRSGSSTTQRQGRSHHEQERDSSRH SGTGHGHTS DGRSRGKDR ESSVGS SDSEGO SEDSRH SVTTHGRS GSSSRNQHGSSSHQSDSDSRHSESHQGRDTDRHKSSES  | 1288           |
| Cattle  |  | VHGRSGSSTTQRQGRSHHEQERDSSRH SGTGHGHTS DGRSRGKDR ESSVGS SDSEGO SEDSRH SVTTHGRS GSSSRNQHGSSSHQSDSDSRHSESHQGRDTDRHKSSES  | 1392           |
| Cattle  |  | VHGRSGSSTTQRQGRSHHEQERDSSRH SGTGHGHTS DGRSRGKDR ESSVGS SDSEGO SEDSRH SVTTHGRS GSSSRNQHGSSSHQSDSDSRHSESHQGRDTDRHKSSES  | 1496           |
|         |  | <u>partial repeat</u>                                                                                                 | <u>C-motif</u> |
| Dolphin |  | CHSRKSGSSTTQRQGRHHEQERDSSRH SGTGHGHTS DGRSRGKDR ESSVGS SDSEGO SEDSRH SVTTHGRS GSSSRNQHGSSSHQSDSDSRHSESHQGRDTDRHKSSES  | 959            |
| Orca    |  | CHSRKSGSSTTQRQGRHHEQERDSSRH SGTGHGHTS DGRSRGKDR ESSVGS SDSEGO SEDSRH SVTTHGRS GSSSRNQHGSSSHQSDSDSRHSESHQGRDTDRHKSSES  | 961            |
| Baiji   |  | CHSRKSGSSTTQRQGRHHEQERDSSRH SGTGHGHTS DGRSRGKDR ESSVGS SDSEGO SEDSRH SVTTHGRS GSSSRNQHGSSSHQSDSDSRHSESHQGRDTDRHKSSES  | 859            |
| Cattle  |  | VHGRSGSSTTQRQGRSHHEQERDSSRH SGTGHGHTS DGRSRGKDR ESSVGS SDSEGO SEDSRH SVTTHGRS GSSSRNQHGSSSHQSDSDSRHSESHQGRDTDRHKSSES  | 1605           |
| Dolphin |  | GSVSHDSSHMGARDRFEYR-----SIYG-IQY-NRQ-----                                                                             | 988            |
| Orca    |  | GSVSHDSSHMGARDRFEYR-----SIYG-IQY-NRQ-----                                                                             | 990            |
| Baiji   |  | GSVSHDSSHMGARDRFEYR-----SIYG-IQY-NRQ-----                                                                             | 888            |
| Cattle  |  | ENFSDSSVVEKRPYRGEMLMRSNITVRNHPGTGHSNISKQIGFGQ                                                                         | 1656           |

**Suppl. Fig. S3. Alignment of amino acid sequences of filaggrin proteins.** Amino acid sequences of filaggrin proteins of bottlenose dolphin (*Tursiops truncatus*), orca (*Orcinus orca*), baiji (*Lipotes vexillifer*) and cattle (*Bos taurus*) were aligned. The S100A domain, sequence repeats, linker segments and a conserved sequence motif close to the C-terminus (C-motif) are indicated above the alignment. Red fonts indicate amino acid residues, that have been conserved in all species. Note that the sequence of cattle filaggrin contains more sequence repeats and partial repeats than filaggrin proteins of other species do. The sequences of several repeats of the cattle are written without alignment to counterparts of cetacean filaggrins. Yellow shading highlights amino acid residues conserved among different sequence repeats. Numbers of the last amino acid residue are shown on the right. Fig. 1A-C show segments of this alignment.

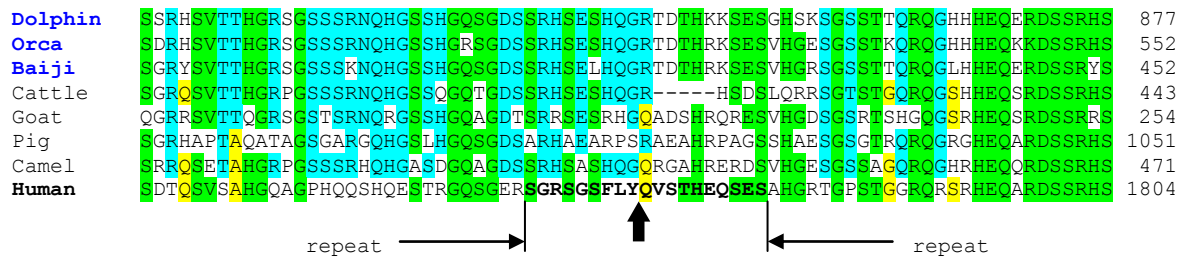

**Suppl. Fig. S4. Amino acid sequence alignment of representative linker regions of filaggrin proteins from different species.** Partial amino acid sequences of human profilaggrin and profilaggrin proteins of species from the mammalian order Cetartiodactyla (comprised of cetaceans and artiodactyla) are aligned. The borders between the linker peptide and the flanking filaggrin monomer repeats (22) are indicated in the human sequence. The vertical arrow indicates the site of human profilaggrin cleavage by saspase (17). Amino acid residues identities are indicated by color shading. Yellow shading indicates residues that are conserved in humans and at least 2 other species but not in cetaceans. Blue shading indicates residues that are conserved in at least 2 cetaceans and at least 2 other species but not in humans. Green shading indicates residues that are conserved in humans and cetaceans. The number of the last amino acid residue of each sequence is shown on the right. Genbank accession numbers: cattle filaggrin, XP\_001255583.5; goat filaggrin, XP\_005677634.1; pig filaggrin, XP\_005663493.1; camel filaggrin, XP\_006188973.1; human filaggrin, NP\_002007.1. The sequences of filaggrins of the dolphin, orca and baiji are shown in Suppl. Figure S3.

```

Dolphin CATAAAA-TCTCCAGTAT--ATGAGAATAATGTAAGCGAAAATTTGGAAC TTGGCAAGCAAGTACAGATGAGGACATGAAGAAGTGGGAAGCAAACAC
Orca CATAAAA-TCTCCAGTAT--ATGAGAATAATGTAAGGCTAAATTTGGAAC TTGGCAAGCAAGTACAGATGAGGACATGAAGAAGTGGGAAGCAAACAC
Baiji CATAAAA-TCTCCAGTAT--ATGAGAATAATGTAAGGCTAAATTTGGAAC TTGGCAAGCAAGTACAGATGAGGACATGAAGAAGTGGGAAGCAAACAC
Cattle CATGAAA-GCTACAACCTGCACGAGAATGATGTAACCTAACT-GTAA TTTGGTAAAAC TGTTACAGATGAGTACGTGAGCAAGTGGGAAGTAAACAG
Pig CATAAAAATCACC AATAT--ATGGGAATGATGTAACCTACATTTGGAAC TTAGTAAAACAAGTACAGATGAGTACGTGAGGAAGTGGGAAGTAAACAC
Camel CATAAAA-TCCCAATAT--ATGGGAATGATGTAACCTAAATTTGGAAC TTGGTAAAACAAGTACAGATGAGTACGTGAGCGATTGGGAAGTAAACAC
Human CATAAAA-TTTC CAAT-----ATGTAACCCAAATTTGGAAC TTGCTGAAACAAGTACAGATGAGTACGTGAGGAAGTGGGAAGTAAACAC

Dolphin A--TTGCTAGAGAAATAATAGAGGTGGAGATATGGGTGGATCTGGGTTTGGTTAGGAATGAATCA SACCAACCTACAGAAGA---TGGCTCCTCCCTGGA
Orca A--TTGCTAGAGAAATAATAGAGGTGGAGATATGGGTGGATCTGGGTTTGGTTAGGAATGAATCA SACCAACCTACAGAAGA---TGGCTCCTCCCTGGA
Baiji A--TTGCTAGAGAAATAATAGAGGTGGAGATATGGGTGGATCTGGGTTTGGTTAGGAATGAATCA SACCAACCTACAGAAGA---TGGCTCCTCCCTGGA
Cattle G--TCGCTAGAGAAATA---GAGGTGGAGATATGGGTGGATCTGAGTTTGGTTAGGAATGAATCA ETCCATCCTACAGAGGA---TGGCTCCTCCCTGGA
Pig A--TAGCTACAGAAATA---GAGGTGGAGATATGGGTGGACCTGGGTTTGGTTAGGAATGAATCA ETCCATCCTACAGAGGAGGATGGCTCCTCCCTGGA
Camel A--TTGCTAGAGAAATA---GAGGTGGAGATATGGGTGGATCTGGGTTTGGTTAGGAATGAATCA SACCATCCTACAGAGTA---TGGCTCCTCCCTAAA
Human AGGTTGCTGGAGAAATA---GAGGTGGAGATATGGGTGGATCTAGGTTTGGTTAGGAATGAATCA SACCATCCCACAGAGGG---TGGCTCCTCCCTGCA

Dolphin TGGA-CCTGCTATAAAAAGGCCATTATCCAGACTTCAGCACACAGCAAGCTCCTTCAGGCTACATTCTACTTGCTCTTCTGGTGAAGGAAGGAAGTAAG
Orca TGGA-CCTGCTATAAAAAGGCCACTATCCAGACTTCAGCACACAGCAAGCTCCTTCAGGCTACATTCTACTTGCTCTTCTGGTGAAGGAAGGAAGTAAG
Baiji TGGA-CCTGCTATAAAAAGGCCATTATCCAGACTTCAGCACACAGCAAGCTCCTTCAGGCTACATTCTACTTGCTCTTCTGGTGAAGGAAGGAAGTAAG
Cattle TGGA-CCTGCTATAAAAAGGCCATGATCCAGTCTTCAGTACCCAGCAACTCCTCCGGGCTACAATCTCCTTGCTCTTCTGGTGAAGGAAGGAAGTAAG
Pig TGGA-CCTGCTATAAAAAGGCCATTATCCAGACTTCAGCACCCAGCAAGCTCCTTCAGGCTACATTCTCCTTGCTCTTCTGGTGAA----GGAAAGTAAG
Camel TG-A-CCTGCTATAAAAAGGCCATTATCCAGGCTTCAGCACCCAGCAAGCTCCTTCAGGCTACGTTCTACTTGCTCTTCTGGTGAA----GGAAAGTAAG
Human TGGGCCTGCTATAAAAAGGCCATTATCTCAGCCTTCAGTACCCAGCAGGCTCCTTCAGGCTACATTCTACTTGCTCTTCTGGTGAA----CAAGGTAAG

```

**Suppl. Fig. S5. Nucleotide sequence alignment of the proximal promoter of filaggrin genes.** Nucleotides conserved in all species are highlighted by red color. The putative binding sites of the transcription factor AP1 and the TATA box are indicated by colored frames. The GT splice donor site at the start of intron 1 is underlined.

**A**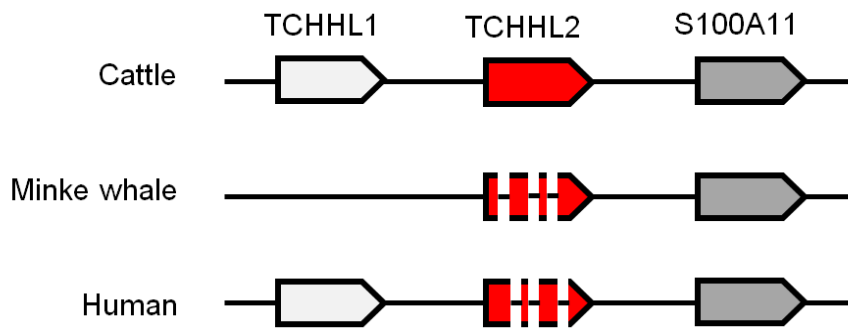**B**

|             |                                                                         |   |   |   |   |   |   |   |   |   |   |   |   |   |   |   |   |   |   |   |   |   |   |   |
|-------------|-------------------------------------------------------------------------|---|---|---|---|---|---|---|---|---|---|---|---|---|---|---|---|---|---|---|---|---|---|---|
|             | M                                                                       | T | H | R | L | L | R | S | I | I | S | I | I | D | A | F | L | P | N | A | K | S | D | G |
| Cattle      | ATGACTCACCGTCTTCTGAGAGCATCATCAGTATCATTGATGCTTTCCTCCCTAATGCAAAGAGTGATGGA |   |   |   |   |   |   |   |   |   |   |   |   |   |   |   |   |   |   |   |   |   |   |   |
| Minke whale | ATGCCTCACGTCTTCTGAGAGTGTATCAGTATCATCAATGTTTCCACTCTTATGCAAAGAGTGATGGA    |   |   |   |   |   |   |   |   |   |   |   |   |   |   |   |   |   |   |   |   |   |   |   |
| Human       | ATGCTTCCTATCTTCTGAGGAGCAGCATCAGTATCATCGACATTTTCCACAAGCACGCA- GAGTGATGGA |   |   |   |   |   |   |   |   |   |   |   |   |   |   |   |   |   |   |   |   |   |   |   |

  

|             |                                                                           |   |   |   |   |   |   |   |   |   |   |   |   |   |   |   |   |   |   |   |   |   |   |
|-------------|---------------------------------------------------------------------------|---|---|---|---|---|---|---|---|---|---|---|---|---|---|---|---|---|---|---|---|---|---|
|             | D                                                                         | C | Q | S | L | N | K | T | E | L | K | K | L | L | Q | E | E | F | G | N | A | L | E |
| Cattle      | GACTGTCAGAGCCTGAACAAGACAGAACTTAAGAACTTCTCCAAGAAGAGTTTGGAAATGCTCTGGAGGT    |   |   |   |   |   |   |   |   |   |   |   |   |   |   |   |   |   |   |   |   |   |   |
| Minke whale | GACTGTCAGAGGCTGAACAAGACAGAACTTGAAGAACTTCTCCAACAAGAGTTTGGAAATGCTCCGGAGGT   |   |   |   |   |   |   |   |   |   |   |   |   |   |   |   |   |   |   |   |   |   |   |
| Human       | GACTGGCAGAGGCTGAACAAGACAAAACCTCAAGACACTTCTCAGACAAGAGTTTGGAAATGGCCTTGGAGGT |   |   |   |   |   |   |   |   |   |   |   |   |   |   |   |   |   |   |   |   |   |   |

**C**

|             |                                                                          |   |   |   |   |   |   |   |   |   |   |   |   |   |   |   |   |   |   |   |   |   |   |
|-------------|--------------------------------------------------------------------------|---|---|---|---|---|---|---|---|---|---|---|---|---|---|---|---|---|---|---|---|---|---|
|             | E                                                                        | S | N | N | S | E | T | T | G | K | I | L | Q | Q | L | D | Q | D | G | D | Q | T | I |
| Cattle      | AGGAATCAAAATAATTCTGAGACAACAGGAAAAATCCTCCAGCAGCTGGATCAAGATGGTGACAAAACAATT |   |   |   |   |   |   |   |   |   |   |   |   |   |   |   |   |   |   |   |   |   |   |
| Minke whale | AGAAATCAAGTAATTCTGAGACAACATAAAAAATCCTCCAAACAGCTGGATCAAGATGGTGACAAAACAGTT |   |   |   |   |   |   |   |   |   |   |   |   |   |   |   |   |   |   |   |   |   |   |
| Human       | AGAAAACAATAATTCTGAGACAATAG-AAAAATCCTCCAAACAGCTGGATCAAGATGGTGACAAAACAGTT  |   |   |   |   |   |   |   |   |   |   |   |   |   |   |   |   |   |   |   |   |   |   |

  

|             |                                                                         |   |   |   |   |   |   |   |   |   |   |   |   |   |   |   |   |   |   |   |   |   |   |   |
|-------------|-------------------------------------------------------------------------|---|---|---|---|---|---|---|---|---|---|---|---|---|---|---|---|---|---|---|---|---|---|---|
|             | D                                                                       | F | S | E | L | I | L | L | M | F | A | V | T | T | A | Y | Y | A | H | I | K | P | L | L |
| Cattle      | GATTCAGTGAATTAATTTGCTCATGTTTGAGTGACAAACAGCCTACTATGCCACATAAAAACCTCTTCTC  |   |   |   |   |   |   |   |   |   |   |   |   |   |   |   |   |   |   |   |   |   |   |   |
| Minke whale | GATTCAGTGAATTCATTTGCTTGTGTTTCGAGTGACAAAACCTATCATGCAAGCATAAAAACCTCTTCTC  |   |   |   |   |   |   |   |   |   |   |   |   |   |   |   |   |   |   |   |   |   |   |   |
| Human       | GATTCAGTGAATTCATTTGCTGGTGCTTACAGTGACAAAAGCCTATCATGCATGCATAAAAAGCTCTTCTC |   |   |   |   |   |   |   |   |   |   |   |   |   |   |   |   |   |   |   |   |   |   |   |

**Suppl. Fig. S6. The trichohyalin-like 2 (*TCHHL2*) genes of whales and humans contain deleterious mutations.** (A) Schematic depiction of the *TCHHL2* gene locus of the cattle (*Bos taurus*), minke whale (*Balaenoptera acutorostrata scammoni*) and human (*Homo sapiens*). The direction of the genes is indicated. The *TCHHL2* genes of the minke whale and human are interrupted by in-frame stop codons and frame shift mutations. (B, C) Nucleotide sequence alignments of the segments of the *TCHHL2* gene. The conceptual translation of the cattle sequence is shown above the nucleotide sequences. (B) Alignment of sequences homologous to the coding sequence within exon 2 of cattle *TCHHL2*. (C) Alignment of sequences homologous to the start of exon 3 of cattle *TCHHL2*. Nucleotides conserved among the three species are highlighted by red letters. Nucleotide deletions causing reading frame shifts as well as an in-frame stop codon are highlighted by black shading and white font. Splice donor (GT) and acceptor sites (AG) at the ends of introns are underlined. The sequences of the deleteriously mutated remnant of the human *TCHHL2* gene correspond to the nucleotide regions 152067724-152067586 and 152063663-152063523 of human genomic DNA (GenBank accession number NC\_000001.11). Accession number for the amino acid sequence of the trichohyalin-like 2 protein in cattle: XP\_005197796.1. The location of the *TCHHL2* gene of the minke whale is indicated in Suppl. Table S1.

```

Human  MSNPRSLEEEKYDMSGARLALILCVTKAREGSEEDLDALEHMFRQLRFESTMKRDPTAEQFQEELEKFQQAIDSR
Mouse  MSDPQPLOEERYDMSGARLALTLCVTKAREGSEVDMEALERMFRLKLFESTMKRDPTAQQFLEELDEFQQTIDNW
Cattle MSSPQPLEEETDMSGARLALTLCVTKAREGSEADLDALERMFQQLGFESTMKRDPTAQQFQEELEKFQQAIDAR

Human  EDPVSCAFVVLMAHGREGFLKGEDGEMVKLENLFEALNNKNCQALRAKPKVYI IQACRGEQRDPGETVG-----
Mouse  EEPVSCAFVVLMAHGEGLLKGEDKEMVRLLEDLFEVLNNKNCALRGKPKVYI IQACRGEHRDPGEELRGNEELG
Cattle EDFVSCAFVVLMAHGLEGRLKKGDEKMVELEDLFQALNNKNCRALRAKPKVYIVQACRGEQRDPGEPVT-----

Human  -----GDEIVMVIKDSPQTIPTYTDALHVYSTVEGYIAYRHDQKGSFIQTLVDVFTKRKGHILELLTEVTRRM
Mouse  GDEELGGDE-VAVLKNNPQSIPTYTDLHIYSTVEGYLSYRHDEKSGFIQTLTDVFIHKKGSILELLEEITRLM
Cattle -----GGHLVMITENTPETIPTYTDLHVSTIEGYIAYRHDQEGSYFIQTLVDVFINKKGPILELLTEVTRRM

Human  AEAELVQEGKARKTNPEIQSTLRKRLYLQ
Mouse  ANTEVMQEGKPRKVNPEVQSTLRKKLYLQ
Cattle AEAEVMQEGEAKVNPEIQSTLRKQLYLQ

```

**Suppl. Fig. S7. Amino acid sequence alignment of caspase-14 proteins.** The amino acid sequences of caspase-14 of human, mouse and cattle were aligned. Caspase-14 is absent in cetaceans. Amino acid residues conserved in all species are shown in red color. The cysteine residue in the catalytic center is highlighted by yellow shading. Amino acid residues after which the human caspase-14 proenzyme is proteolytically processed (Hibino T, Fujita E, Tsuji Y, Nakanishi J, Iwaki H, Katagiri C, Momoi T. 2010. Purification and characterization of active caspase-14 from human epidermis and development of the cleavage site-directed antibody. *J Cell Biochem* 109: 487-497) are indicated by blue shading. The latter residues are partly conserved in the mouse but not in the cattle. Accession numbers: human caspase-14, NP\_036246.1; mouse caspase-14, NP\_033939.1; cattle caspase-14, NP\_001192772.1.



```

Dolphin MEGSPGIGGRSGS-----PKIPPAMEELQSRLQETLDLLSSQELRSFRDHLKKVEPRVSQVKLELEGRSPSGLA
Orca MEGSPGIGGRSGS-----PKIPPAMEELQSRLQETLDLLSSQELRSFRDHLKKVEPRVSQVKLELEGRSPSGLA
Baiji MEGSPGIGWRSGSDSSRAPPKIPPAMEELQSRLQETLDLLSSQELRSFRDHLKKVEPRVSQVKLELEGRSPSGLA
Sperm whale MEGSPGIGWRSGADSSRTPPKIPPAMEELQSRLQETLDLLSSQELRSFRDHLKKVEPRVSQVKLELEGCSPSGLA
Minke whale MEGSPGIGWRSGSDGSRAPPKIPPAMEELQSRLQETLDLLSSQELRSFRDHLRKKVEPRVSQVKLELEGRSPSELA
Cattle MEGSLGSGRRSGSDGQPAPPKISPTTEELQSRLQETLDLLSSQELRSFRDHLKKVEPPVSQVKLELEGHSPSGLA

Dolphin RLLAKQYYPAAAKRVLVQVLEQLPRADLLPRWQSAADGPVPRKIPKRSYDCVEGELDRYDLSGRRKAFLMVC
Orca RLLAKQYYPAAAKRVLVQVLEQLPRADLLPRWQSAADGPVPRKIPKRSYDCVEGELDRYDLSGRRKAFLMVC
Baiji RLLAKQYYPAAAKRVLVQVLEQLPRADLLPRWQSAADGPVPRKIPKRSYDCVEGELDRYDLSGRRKAFLMVC
Sperm whale RLLAKQYYPAAAKRVLVQVLEQLPRADLLPRWQSAADGPVPRKIPKRSYDCVEGELDRYDLSGRRKAFLMVC
Minke whale RLLAKQYYPAAAKRVLVQVLEQLPRADLLPRWQSAAXXXVPRKIPKRSYDCVEGELDHYDLSGRRKAFLMVC
Cattle KLLAKHYYPAAVAKRVLVQVLELLPRADLLPRWQSAPTDCPVIPRKSILKRSYDCVDGELYRDLGRRKAFLMVC

Dolphin MRDRLGAHQDVLLEMDWLGQCQFENTLCIDDPKME LLGKIT'SFRDGLNEIKDDIGCCLVALMSHGEEGFIMKMDG
Orca TRDRLGAHQDVLLEMDWLGQCQFENTLCIDDPKME LLGKIT'SFRDGLNEIKDDIGCCLVALMSHGEEGFIMKMDG
Baiji KRNRLGAHQDVLLEMDWLGQCQFENTLCIDDPKME LLGKIT'SFRDGLNEIKDDIGCCLVALMSHGEEGFIMKMDG
Sperm whale KRNRLGAHQDVLLEMDWLGQCQFENTLCIDDPKME LLGKIT'SFRDGLNEIKDDIGCCLVALMSHGEEGFIRMKDG
Minke whale KRNRLGAHQDVLLEMDWLGQCQFENTLCIDDPKME LLGKIT'SFRDGLNEIKDDIGCCLVALMSHGEEGFIRMKDG
Cattle KKNRLGAHQDVQLMKDWLKECKFEP'LCIDDPKMDLLGKIT'SFRDE LNEIKDDIGCCLVTLM SHGEEGFIMKMDG

Dolphin EKVSLEGI FEMFNKNCPALQE KPKIF I IQA CRGERRDSGVETDDEPMSDDGSEKRLRPTFSDYFI IYPTQADH
Orca EKVSLEGI FEMFNKNCPALQE KPKIF I IQA CRGERRDSGVETDDEPMSDDGSEKRLRPTFSDYFI IYPTQADH
Baiji EKVSLEGI FEMFNKNCPALQE KPKIF I IQA CRGERRDSGVETDDEPMSDDGSEKRLRPTFSDYFI IYPTQADH
Sperm whale EKVSLEGI FEMFNKNCPALQE KPKIF I IQA CRGERKDSGVETDDEPMSDDGSEKRLRPTFSDYFI IYPTQADH
Minke whale EKVSLEGI FEMFNKNCPALQE KPKIF I IQA CRGERRDSGVETDDEPMSDDGSEKRLRPTFSDYFI IYPTQADH
Cattle EKVSLEDIFEMFNKNCPALQE KPKIF I IQA CRGERRDSGVETDDEPMDLDGSEKRLRPTFSDYFI IYPTQADH

Dolphin VALRDPRTGSVMIKAMTEVFKQYGNKWHIADFFTKVNNRVVHREFNLRNEPIKVSLVMESTLTKFVYF
Orca VALRDPRTGSVMIKAMTEVFKQYGNKWHIADFFTKVNNRVVHREFNLRNEPIKVSLVMESTLTKFVYF
Baiji VALRDPRTGSVMIKAMTEVFKQYGNKWHIADFFTKVNNRVVHREFNLRNEPIKVSLVMESTLTKFVYF
Sperm whale VALRDPRTGSVMIKAMTEVFKQYGNKWHIADFFTKVNNRVVHREFNLRNEPIKVSLVMESTLTKFVYF
Minke whale VALRDPRTGSVMIKAMTEVFKQYGNKWHIADFFTKVNNRVVHREFNLRNEPIKVSLVMESTLTKFVYF
Cattle VALRDPRTGSVMIKEMTEVFKQYGNKWHLADFFTIVNNRVVHRDFNLCKNPVKVSLVMESTLTKFVYF

```

**Suppl. Fig. S8. Amino acid sequence alignment of caspase-15 proteins.** The amino acid sequences of caspase-15 from cetaceans and cattle were aligned. Amino acid residues conserved in all species are shown in red color. Note that the gene encoding caspase-15 has been lost during the evolution of the human genome (39). The cysteine residue in the catalytic center is highlighted by yellow shading, aspartic acid residues after which pro-caspase-15 is cleaved by autoprocessing (43) are indicated by blue shading. Because of a gap in the genome sequence of the minke whale, the amino acid sequence of caspase-15 of this species could not be predicted completely. The missing amino acid residues are indicated by XXXXX. Note that several of the protein sequences have erroneously been termed “caspase-14-like” in the GenBank. Accession numbers: cattle caspase-15, AAY17561.1; orca caspase-15, XP\_004277897.1; baiji caspase-15, XP\_007468210.1; sperm whale caspase-15, XP\_007119635.1; minke whale caspase-15, XP\_007191619.1. Since the genome sequence of the dolphin appeared to be assembled incorrectly in the region of the *CASP15* gene, we amplified and sequenced parts of exon 1 (primers 5'-CCGAAGATCCCGCCGCCATG-3' and 5'-CAACCCTGGGAATCTCCGCGC-3') and exon 4 (5'-TCTGGGTTTTCTACTTGCAG-3' and 5'-TCAGCTAAGCGTCCGCTAATG-3') of genomic DNA from the dolphin. The resulting sequences have been submitted to the GenBank. Based on our experimental data, the following sequences correspond to exons of the *CASP15* gene of the dolphin: Exon 1, NW\_004233528.1, nucl. 502-923 with corrections; exon 2, NW\_004238427.1, nucl. 1431-1483; exon 3, NW\_004218277.1, nucl. 15221-15072; exon 4, NW\_004218277.1: 16020-15827 and nucl. 11158-11127 with corrections; exon 5, NW\_004218277.1, nucl. 11535-11519; exon 6, NW\_004212924.1, nucl. 40421-40312; exon 7, NW\_004212924.1, nucl. 36859-36861.

A F Q E E L A Q F R E Q L D T C R G P V S C A L V A

Human AGGCTTTCCAGGAGGAGCTGGCCCATTCCGGGAGCAACTGGACACCTGCAGGGGCCCTGTGAGCTGTGCCCTTGTGGCC

Cattle AGACTTTCCAGGAGGAGATGGCCCATTCCGGAAGCGGCTGGACGCCACAGGGGGCCCGTGAGCTGTGCCCTTGTGGCC

Dolphin AGACTTTCCAGGAGGAGATGGTCCATTTCTGGGAGTGGCTGGATGCCTGCAGGGACCCTGTGAGCTGTGCCCTTGTGGCC

Orca AGACTTTCCAGGAGGAGATGGTCCATTTCTGGGAGTGGCTGGATGCCTGCAGGGGCCCTGTGAGCTGTGCCCTTGTGGCC

Sperm whale AGGCTTTCCAGGAGGAGATGGCCCATTTCTGGGAGTGGTGGATGCCTGCAGGGGCCCTGTGAGCTGTGCCCTTGTGGCC

Minke whale AGGCTTTCCAGGAGGAGATGGCCCATTTCTGGGAGTGGCTGGATGCCTGCAGGGGCCCTGTGAGCTGTGCCCTTGTGGCC

L M A H G G P R G Q L L G A D G Q E V Q P E A L M Q E

Human CTGATGGCCCATGGGGACCACGGGTCAGCTGCTGGGGGCTGACGGCAAGAGGTGCAGCCGAGGCACTCATGCAGGA

Cattle CTCATGGCCCACGGGGGCCTCAGGGCAGCTCCTGGGGGCTGACGGCAAGAGAGGCAGCTGGAGGTGCTTGTGCAGGA

Dolphin CTGATGGCCCACGGGGGCCTCAGAGGCAGCTACTGGGTGCTGATAGGTAAGAGGTGCAGCCAGAGCGCTGGTGCAGGA

Orca CTGATGGCCCACGGGGGCCTCAGGGCAGCTACTGGGTGCTGATAGGTAAGAGGTGCAGCCAGAGCGCTGGTGCAGGA

Sperm whale CTGATGGCCCATGGGGGCCTCAGGGCAGCTACTGGGGGCTGATAGGTAAGAGGTGCAGCCAGAGTGCTGGTGCAGGA

Minke whale TTGATGGCCCACGGGGGCCTCAGGGCAGCTACTGGGGGCTGATAGGTAAGAGGTGCAGCCAGAGCGCTGGTGCAGGA

L S R C Q V L Q G R P K I F L L Q A **C** R G

Human GCTGAGCCGCTGCCAGGTGCTGCAGGGCCGCCCAAGATCTTCCTGTTGCAGGCCTGCCGTGGGGGT

Cattle GCTGAGCCACTGCGGGCGCTGCGGGCCGCCCAAGATCTTCCTGCTTCAGGCTTGCCGTGGGGGT

Dolphin GCTGAGCTGCTGTAGGGCCCTGTGGGGCTGCCCAAGATCTTCCTGCTTCAGGCTTGCCATGGG-GT

Orca GCTGAGCTGCTGTAGGGCCCTGTGGGGCTGCCCAAGATCTTCCTGCTTCAGGCTTGCTGTGGG-GT

Sperm whale GCTGAGCTGCGTAGGGCCCTGTGGGGCCGCCCAAGATCTTCCTGCTTCAGGCTTGCCGTGGG-GT

Minke whale GCTGAGCTGCTGTAGGGCCCTGTGGGGCCGCCCAAGATCTTCCTGCTTCAGGTTTGCCGTGGG-GT

**Suppl. Fig. S9. Nucleotide sequence alignment of exon 6 of the *CASP16* gene of various species.** Nucleotides identical in all species are shown in red. Mutations leading to in-frame stop codons or frame shifts are highlighted by black shading and white font. The amino acid sequence encoded by exon 6 of human *CASP16* is shown above the nucleotide sequences. The cysteine residue homologous to the active center of other caspases is highlighted by yellow shading. Note that the genomic region corresponding to this exon is absent from the *CASP16* pseudogene of the baiji (not shown). Splice acceptor (AG) and donor (GT) sites at the ends of the flanking introns are underlined.

**A**

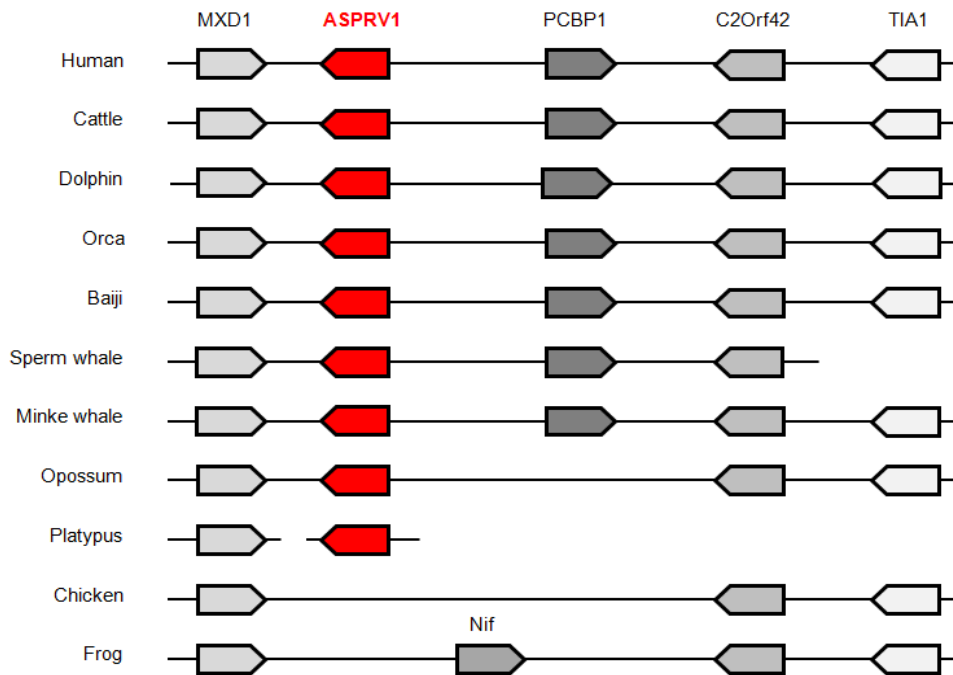

**B**

Dolphin **MAGSAARS**WEGHREHAFVLEPF~~FD~~GANVAPHLWLNRF~~FEVI~~SDLSHWDHATKLRFLK**ESLRG**DALEA  
 Orca **MAGSAARS**WEGHREHAFVLEPF~~FD~~GANVAPHLWLNRF~~FEVI~~SDLSHWDHATKLRFLK**ESLRG**DALEA  
 Baiji **MAGSAARS**WEGRREDAFVLEPF~~FD~~GANVAPHLWLNRF~~FEVI~~SDLSHWDHATKLRFL**RESLRG**DALEA  
 Sperm whale **MAGSRARS**QEGRRQYAFVLEPF~~FD~~GANAAPHLWLNRF~~FEVI~~SDLNHWDHATKLRFLK**ESLRG**DALEV  
 Minke whale **MAGSGARS**REGRRHAFVLEPF~~FD~~GANVAPHLWLYR~~FEVI~~SDLNHWDHATKLRFLK**ESLRG**DALEV  
 Cattle **MAGSGVRS**QE----RAFVPEPF~~FD~~GASVAPHLWLNRF~~FEVI~~NHNLNHWHDITKLRFLK**ESLRG**DALGA  
 Human **MAGSGARSE**EGRRQHA**FAV**PEPF~~FD~~GANVVPNLWLHS**FEVI**INDLNHWDHITKLRFLK**ESLRG**EALGV

Dolphin **Y**SGLSPE**DQGE**Y**GAVKE**ALLKTTGG**PGA**AHSYQ**PKEILFAN**SMGKGYLLKGNIGDVPV**SFLV**D**SG**  
 Orca **Y**SGLSPE**DQGE**Y**GAVKE**ALLKTTGG**PGA**AHSYQ**PKEILFAN**SMGKGYLLK**GKIG**DVPV**SFLV**D**SG**  
 Baiji **Y**SGLSPE**DQGE**Y**GAVKE**ALLKTSGG**PGA**AHGYQ**PKEILFTN**SMGKGYLLK**GKIG**DVPV**SFLV**D**SG**  
 Sperm whale **Y**SGLSPE**DQGE**Y**GAVKET**LLKTSGG**PGV**APSYQ**PKEILFAN**SMGKGYLLK**GKIG**EV**VPV**SFLV**D**SG  
 Minke whale **Y**SGLSPE**DQGE**Y**RAVKET**LLKTFGG**PGV**AHSYQ**PKEILFAN**SMGKGYLLK**GKIG**EV**VPV**SFLV**D**SG  
 Cattle **F**NGLSPED**QGN**Y**EAVKET**LLKTFGG**PEA**AHSHLP**K**KEIV**FAN**SMGKGYLLK**GKIG**KVPV**RFLV**D**SG**  
 Human **Y**NRLSP**QDQGD**Y**GT**VKEALLK**AF**GV**PGA**APSHLP**K**KEIV**FAN**SMGKGYLLK**GKIG**KVPV**RFLV**D**SG**

Dolphin **AQVSVVHPR**LWKEV**TG**DDLTLRPFEN**VVK**VANGAEMKILGVWDT**VISL**GLTKLKA**AF**LVAN**ASA**  
 Orca **AQVSVVHPR**LWKEV**TG**DDLTLRPFEN**VVK**VANGAEMKILGVWDT**VISL**GKLLKKA**AF**LVAN**ASA**  
 Baiji **AQVSVVHPR**LWKEV**TG**DNLDALRPFEN**VVK**VANGAEMKILGVWDT**VISL**GKLELKA**AF**LVAD**ASA**  
 Sperm whale **AQVSVVHPR**LW**EEV**TNGDDLALRPFED**VVK**VANGAEMKILGVWDT**VVSL**GKMKLKA**AF**LVAY**ASM**  
 Minke whale **AQVSVVHPS**LW**EEV**TGDDLTLRPFEN**VVK**VANGAELKILGVWDT**EVSL**GKLLKKA**AF**LVAN**ASA**  
 Cattle **AQVSVVHPS**LW**EEV**TGDELTLRPFEN**VVK**VANGAEMKILGVWDT**VVSL**GKLLKKA**AF**LVAN**ASA**  
 Human **AQVSVVHPN**LW**EEV**TGDDLTLRPFEN**VVK**VANGAEMKILGVWDT**AVSL**GKLLKKA**QF**LVAN**ASA**

Dolphin **E**DAI**IG**TDL**LQD**HNA**VLD**FEHRT**CT**L**Q**GKK**F**RL**LP**VGG**S**LE**DEF**D**LE**FIEEELY**SE**EG**RQ**QL**PY**  
 Orca **E**DAI**IG**TDL**LQD**HNA**VLD**FEHRT**CT**L**Q**GKK**F**RL**LP**VGG**S**LE**DEF**D**LE**FIEEELY**SE**EG**RQ**QL**PY**  
 Baiji **E**EAI**IG**TDL**LQD**Q**GA**V**LD**FEHRT**CT**L**K**G**M**K**F**RL**LP**VGG**S**LE**DEF**D**LE**FIEEELY**SE**GG**RQ**QL**SY**  
 Sperm whale **E**EAI**IG**TDL**LQD**HNA**VLD**FEHRT**CT**L**R**G**K**K**F**RL**LP**VGG**S**RE**DEF**N**LD**LIEEELY**SE**EG**RQ**QL**FY**  
 Minke whale **E**DAI**IG**TDL**LQD**HNA**VLD**FEH**HT**CT**L**K**G**K**F**RL**LP**VGG**S**LE**DEF**D**LE**LIEE**EPY**SE**EG**RQ**QLSY**  
 Cattle **E**EAI**IG**T**DV**L**QD**HNA**VLD**FEHRT**CT**L**K**G**R**K**F**RL**LP**VGG**S**LE**DEF**D**LE**LIEE**EPS**SE**EG**G**Q**QL**SC**  
 Human **E**EAI**IG**T**DV**L**QD**HNA**ILD**FEHRT**CT**L**K**G**K**K**F**RL**LP**VGG**S**LE**DEF**D**LE**LIEE**DPS**SE**EG**R**Q**EL**SH**

**Suppl. Fig. S10. Conservation of ASPRV1 (saspase) in cetaceans. (A)** Comparison of the aspartic peptidase retroviral-like 1 (ASPRV1) gene locus in vertebrates. Protein-coding genes at genomic loci flanked by MXD1 and TIA1 are shown for cetaceans, other mammals and 2 non-mammalian species. In the genome sequences of the sperm whale and the platypus, the current sequence assembly of this region is incomplete. “Dolphin” refers to *Tursiops truncatus*, and “frog” refers to *Xenopus tropicalis*. MXD1, MAX dimerization protein 1; ASPRV1, saspase; PCBP1, poly(rC) binding protein 1; C2Orf42,

chromosome 2 open reading frame 42; TIA1, TIA1 cytotoxic granule-associated RNA binding protein; Nif, low molecular weight neuronal intermediate filament. **(B)** Amino acid sequence alignment of saspase (ASPRV1) proteins. The open reading frames of ASPRV1 genes were conceptually translated, and the sequences corresponding to the 28 kDa proform of saspase (44) were aligned. Amino acid residues, that are conserved in all species, are marked by red letters. The aspartic acid residue in the catalytic center is highlighted by yellow shading. Residues corresponding to the proenzyme processing sites, as determined by Matsui et al. (45), are indicated by blue shading. The position of an unknown amino acid residue, that corresponds to an undefined nucleotide in the nucleotide sequence in the *ASPRV1* gene of the baiji, is indicated by X.

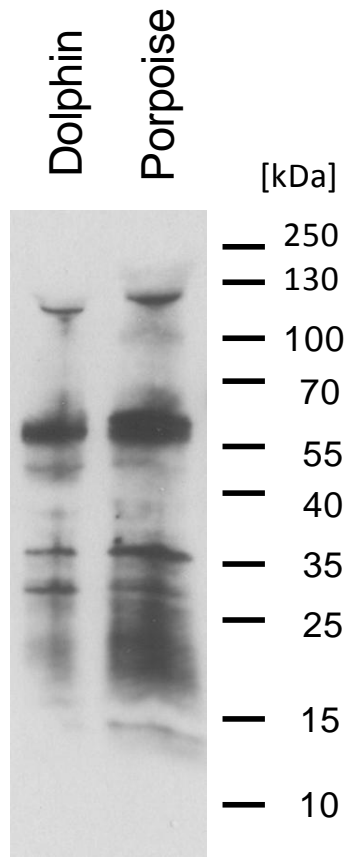

**Suppl. Fig. S11. Immunoblot analysis of epidermal protein extracts using an anti-filaggrin antibody.** Proteins were extracted from the epidermis of a stranded dolphin (*Tursiops truncatus*) and a stranded harbor porpoise (*Phocoena phocoena*) (tissue samples in ethanol, kindly provided by Rob Deaville, Zoological Society of London, London, UK). Immunoblot analysis was performed according to a published protocol with modifications (Fischer H, Rossiter H, Ghannadan M, *et al. Differentiation* 2005: **73**: 406-413). Tissue samples were lysed in a buffer containing 62.5 mM Tris/HCl (pH 6.8), 6 M urea, and 2% SDS, and boiled in the presence of 5%  $\beta$ -mercaptoethanol. The lysates were electrophoresed through an 8–18% gradient polyacrylamide gel containing SDS and blotted onto a nitrocellulose membrane. Blots were incubated with a rabbit polyclonal anti-filaggrin antibody (1:500) (Covance, Berkely, CA; catalog number: PRB-417P), followed by incubation with goat anti-rabbit-HRP (Bio-Rad, USA) and development with the enhanced chemiluminescence (ECL) detection system. The predicted molecular weight of dolphin profilaggrin is 108.3 kDa. The identity of the bands remains to be determined as the epitope of the antibody is only partly conserved in dolphins, and unspecific binding of the antibody to other proteins is possible. Of note, filaggrin fragments in the size range of 17-30 kDa have been reported for epidermal lysates of caspase-14 knockout mice (21, 56). The positions of molecular weight marker bands are indicated on the right. kDa, kilo-Dalton.

**Suppl. Table S1. S100 fused-type protein (SFTP) genes of cetaceans**

| Species     | Gene       | Accession nr. of genomic sequence | Exon 1 end | Exon 2 start | CDS start | Exon 2 end | Exon 3 start | CDS end  | Protein encoded | Note                                           |
|-------------|------------|-----------------------------------|------------|--------------|-----------|------------|--------------|----------|-----------------|------------------------------------------------|
| Dolphin     | CRNN       | n.a.                              | n.d.       | n.d.         | n.d.      | n.d.       | n.d.         | n.d.     | no              |                                                |
|             | FLG2       | NW_004201070.1                    | n.d.       | n.d.         | 14202     | 14339      | 15363        | >15790   | no              | frameshift                                     |
|             | <b>FLG</b> | NW_004211506.1                    | 21638      | 34353        | 34374     | 34511      | 35579        | 38407    | <b>yes</b>      |                                                |
|             | HRNR       | NW_004211506.1                    | n.d.       | n.d.         | 67642     | 67779      | 70056        | 73338    | no              | premature stop codons and frameshift in exon 3 |
|             | RPTN       | NW_004203980.1                    | n.d.       | n.d.         | n.d.      | n.d.       | >55359       | <54832   | no              | premature stop codons                          |
|             | TCHH       | NW_004220296.1                    | n.d.       | n.d.         | n.d.      | n.d.       | <26622       | >27194   | no              |                                                |
|             | TCHHL1     | NW_004199860.1                    | n.d.       | n.d.         | n.d.      | n.d.       | >214945      | <214724  | no              | premature stop codon                           |
|             | TCHHL2     | n.a.                              | n.d.       | n.d.         | n.d.      | n.d.       | n.d.         | n.d.     | no              |                                                |
| Orca        | CRNN       | n.a.                              | n.d.       | n.d.         | n.d.      | n.d.       | n.d.         | n.d.     | no              |                                                |
|             | FLG2       | NW_004438651                      | n.d.       | n.d.         | 2264261   | 2264124    | 2263105      | <2261150 | no              | premature stop codons in exon 3                |
|             | <b>FLG</b> | NW_004438651                      | 2229026    | 2216289      | 2216268   | 2216131    | 2215312      | 2212566  | <b>yes</b>      | sequence gap in the middle of exon 3           |
|             | HRNR       | NW_004438651                      | n.d.       | n.d.         | n.d.      | n.d.       | 2184107      | <2183688 | no              | premature stop codon                           |
|             | RPTN       | n.a.                              | n.d.       | n.d.         | n.d.      | n.d.       | n.d.         | n.d.     | no              |                                                |
|             | TCHH       | NW_004438651                      | n.d.       | n.d.         | n.d.      | n.d.       | >2147857     | <2147309 | no              |                                                |
|             | TCHHL1     | n.a.                              | n.d.       | n.d.         | n.d.      | n.d.       | n.d.         | n.d.     | no              |                                                |
|             | TCHHL2     | n.a.                              | n.d.       | n.d.         | n.d.      | n.d.       | n.d.         | n.d.     | no              |                                                |
| Baiji       | CRNN       | NW_006787556.1                    | n.d.       | n.d.         | n.d.      | n.d.       | 1312295      | >1311978 | no              | premature stop codon                           |
|             | FLG2       | NW_006787556.1                    | n.d.       | n.d.         | n.d.      | n.d.       | 1279072      | >1277439 | no              | frameshift; premature stop codon               |
|             | <b>FLG</b> | NW_006787556.1                    | 1245034    | 1219352      | 1219331   | 1219194    | 1218369      | 1215844  | <b>yes</b>      |                                                |
|             | HRNR       | n.a.                              | n.d.       | n.d.         | n.d.      | n.d.       | n.d.         | n.d.     | no              |                                                |
|             | RPTN       | n.a.                              | n.d.       | n.d.         | n.d.      | n.d.       | n.d.         | n.d.     | no              |                                                |
|             | TCHH       | n.a.                              | n.d.       | n.d.         | n.d.      | n.d.       | n.d.         | n.d.     | no              |                                                |
|             | TCHHL1     | n.a.                              | n.d.       | n.d.         | n.d.      | n.d.       | n.d.         | n.d.     | no              |                                                |
|             | TCHHL2     | n.a.                              | n.d.       | n.d.         | n.d.      | n.d.       | n.d.         | n.d.     | no              |                                                |
| Sperm whale | CRNN       | NW_006718175.1                    | n.d.       | n.d.         | n.d.      | n.d.       | 68985        | >70620   | no              | frameshift; premature stop codon               |
|             | FLG2       | n.a.                              | n.d.       | n.d.         | n.d.      | n.d.       | n.d.         | n.d.     | no              |                                                |
|             | FLG        | n.a.                              | n.d.       | n.d.         | n.d.      | n.d.       | n.d.         | n.d.     | no              |                                                |
|             | HRNR       | n.a.                              | n.d.       | n.d.         | n.d.      | n.d.       | n.d.         | n.d.     | no              |                                                |
|             | RPTN       | NW_006717962.1                    | n.d.       | n.d.         | 99953     | 99813      | n.d.         | n.d.     | no              |                                                |
|             | RPTN       | NW_006717628.1                    | n.d.       | n.d.         | n.d.      | n.d.       | <38056       | >38532   | no              | premature stop codons                          |
|             | TCHH       | NW_006716874.1                    | n.d.       | n.d.         | 115803    | 115958     | n.d.         | n.d.     | no              | premature stop codon                           |
|             | TCHHL1     | NW_006712966.1                    | n.d.       | n.d.         | >463584   | <463522    | n.d.         | n.d.     | no              |                                                |
| TCHHL2      | n.a.       | n.d.                              | n.d.       | n.d.         | n.d.      | n.d.       | n.d.         | no       |                 |                                                |
| Minke whale | CRNN       | NW_006726465.1                    | n.d.       | n.d.         | 2404904   | 2404761    | 2403542      | <2402073 | no              | premature stop codons in exons 2 and 3         |
|             | FLG2       | n.a.                              | n.d.       | n.d.         | n.d.      | n.d.       | n.d.         | n.d.     | no              |                                                |
|             | FLG        | n.a.                              | n.d.       | n.d.         | n.d.      | n.d.       | n.d.         | n.d.     | no              |                                                |
|             | HRNR       | NW_006726465.1                    | n.d.       | n.d.         | 2355919   | 2355782    | 2353959      | <2352958 | no              | premature stop codon in exon 3                 |
|             | RPTN       | n.a.                              | n.d.       | n.d.         | n.d.      | n.d.       | n.d.         | n.d.     | no              |                                                |
|             | TCHH       | n.a.                              | n.d.       | n.d.         | n.d.      | n.d.       | n.d.         | n.d.     | no              |                                                |
|             | TCHHL1     | n.a.                              | n.d.       | n.d.         | n.d.      | n.d.       | n.d.         | n.d.     | no              |                                                |
|             | TCHHL2     | NW_006726465.1                    | n.d.       | n.d.         | 2286435   | 2286295    | 2283077      | <2282193 | no              | premature stop codons in exon 3                |

Notes: CRNN, cornulin; FLG-2, filaggrin-2; FLG, filaggrin; HRNR, hornerin; RPTN, repetin; TCHH, trichohyalin; TCHHL1, trichohyalin-like 1; TCHHL2, trichohyalin-like 2; nr., number; n.d., not determed; CDS, coding seunqce; ORF, open reading frame. Some genomic sequence scaffolds contain genes in negative orientation, that is the 5'-end of the gene has a higher nucleotide number (within the reference genomic sequence) than the 3'-end.

**Suppl. Table S2. Interspecies amino acid sequence identity (%) of filaggrin repeats and linkers**

|         | Human | Cattle | Baiji | Orca  | Dolphin |
|---------|-------|--------|-------|-------|---------|
| Human   | 100.0 | 41.5   | 35.7  | 35.2  | 35.2    |
| Cattle  | 41.5  | 100.0  | 70.5  | 72.0  | 72.0    |
| Baiji   | 35.7  | 70.5   | 100.0 | 90.5  | 90.5    |
| Orca    | 35.2  | 72.0   | 90.5  | 100.0 | 98.5    |
| Dolphin | 35.2  | 72.0   | 90.5  | 98.5  | 100.0   |

Note: Amino acid sequences corresponding to the following regions of profilaggrin from different species were aligned and the percentage of positions with pairwise sequence identity were calculated: human profilaggrin (NP\_002007.1) residues 1669-1869, cattle profilaggrin (XP\_001255583.5) residues 1669-1869, baiji profilaggrin residues 317-515, orca profilaggrin residues 308-506 and dolphin profilaggrin residues 308-506. The aligned sequences correspond in length to 1 repeat + linker of cattle and cetacean filaggrin and to a part of the human filaggrin repeat + linker. The human filaggrin repeats are longer than those cetartiodactyls. The segment of the human filaggrin repeat which does not have a counterpart in cetartiodactyls was not included in the determination of identity values. Species: human (*Homo sapiens*), cattle (*Bos taurus*), baiji (*Lipotes vexillifer*), orca (*Orcinus orca*) and dolphin (*Tursiops truncatus*).
